# Supplementary material
Source: Springer Nature journal article supplement (https://www.springermedizin.de/resource/supplementary/13046_2012_628_MOESM2_ESM.pdf/9662600)
Supplement: MOESM2 [file 9662600]

# 208+7=215 Overall Active Therapy plus Supportive Care

## 147+56+5=208 Overall Active Therapy

### First Line

n=255 systemic therapy

**n=147 systemic therapy outside of clinical trial**

n=23 other therapies

### Second Line

n=135 systemic therapy

**n=112 systemic therapy outside of clinical trial**

**→ 56 of 112 not included in previous lines**

n=5 other therapies

### Third Line

n=48 systemic therapy

**n=41 systemic therapy outside of clinical trial**

**→ 5 of 41 not included in previous lines**

n=2 other therapies

### Supportive Care

n=24 total

n=17 with at least one line of active systemic therapy outside of a clinical trial

**n=7 with no prior resource utilization recorded**
